# Supplementary material
Source: publisher figshare collection journal article supplement (https://acs.figshare.com/ndownloader/files/10384380)
Supplement: Supplementary file 1 [file 10384380]

 
data_11deca_0m
 
_audit_creation_method            SHELXL-97
_chemical_name_systematic
;
 ?
;
_chemical_name_common             ?
_chemical_melting_point           ?
_chemical_formula_moiety          'C17 H18 N2 O2'
_chemical_formula_sum
 'C17 H18 N2 O2'
_chemical_formula_weight          282.33
 
loop_
 _atom_type_symbol
 _atom_type_description
 _atom_type_scat_dispersion_real
 _atom_type_scat_dispersion_imag
 _atom_type_scat_source
 'C'  'C'   0.0033   0.0016
 'International Tables Vol C Tables 4.2.6.8 and 6.1.1.4'
 'H'  'H'   0.0000   0.0000
 'International Tables Vol C Tables 4.2.6.8 and 6.1.1.4'
 'N'  'N'   0.0061   0.0033
 'International Tables Vol C Tables 4.2.6.8 and 6.1.1.4'
 'O'  'O'   0.0106   0.0060
 'International Tables Vol C Tables 4.2.6.8 and 6.1.1.4'
 
_symmetry_cell_setting            Triclinic 
_symmetry_space_group_name_H-M    p-1
 
loop_
 _symmetry_equiv_pos_as_xyz
 'x, y, z'
 '-x, -y, -z'
 
_cell_length_a                    7.840(5)
_cell_length_b                    9.312(5)
_cell_length_c                    11.055(5)
_cell_angle_alpha                 88.607(5)
_cell_angle_beta                  71.857(5)
_cell_angle_gamma                 75.099(5)
_cell_volume                      739.8(7)
_cell_formula_units_Z             2
_cell_measurement_temperature     100(2)
_cell_measurement_reflns_used     2112
_cell_measurement_theta_min       2.8
_cell_measurement_theta_max       25.1
 
_exptl_crystal_description        block
_exptl_crystal_colour             white
_exptl_crystal_size_max           0.20
_exptl_crystal_size_mid           0.20
_exptl_crystal_size_min           0.10
_exptl_crystal_density_meas       ?
_exptl_crystal_density_diffrn     1.267
_exptl_crystal_density_method     'not measured'
_exptl_crystal_F_000              300
_exptl_absorpt_coefficient_mu     0.084
_exptl_absorpt_correction_type    empirical
_exptl_absorpt_correction_T_min   0.983
_exptl_absorpt_correction_T_max   0.992
_exptl_absorpt_process_details    'SADABS'
 
_exptl_special_details
;
 ?
;
 
_diffrn_ambient_temperature       100(2)
_diffrn_radiation_wavelength      0.71073
_diffrn_radiation_type            MoK\a
_diffrn_radiation_source          'fine-focus sealed tube'
_diffrn_radiation_monochromator   graphite
_diffrn_measurement_device_type   'CCD area detector'
_diffrn_measurement_method        'phi and omega scans'
_diffrn_detector_area_resol_mean  ?
_diffrn_standards_number          ?
_diffrn_standards_interval_count  ?
_diffrn_standards_interval_time   ?
_diffrn_standards_decay_%         ?
_diffrn_reflns_number             9106
_diffrn_reflns_av_R_equivalents   0.0377
_diffrn_reflns_av_sigmaI/netI     0.0410
_diffrn_reflns_limit_h_min        -9
_diffrn_reflns_limit_h_max        9
_diffrn_reflns_limit_k_min        -11
_diffrn_reflns_limit_k_max        11
_diffrn_reflns_limit_l_min        -13
_diffrn_reflns_limit_l_max        13
_diffrn_reflns_theta_min          2.83
_diffrn_reflns_theta_max          25.13
_reflns_number_total              2642
_reflns_number_gt                 2112
_reflns_threshold_expression      >2sigma(I)
 
_computing_data_collection        'Bruker SMART APEX'
_computing_cell_refinement        'Bruker SMART'
_computing_data_reduction         'Bruker SAINT PLUS'
_computing_structure_solution     'SIR97(Altomare, et. al. 1999)'
_computing_structure_refinement   'SHELXL-97 (Sheldrick, 1997)'
_computing_molecular_graphics     'Ortep-3 for Windows (Farrugia, 1997)'
_computing_publication_material   'WinGX publication routines (Farrugia, 1999)'
 
_refine_special_details
;
 Refinement of F^2^ against ALL reflections.  The weighted R-factor wR and
 goodness of fit S are based on F^2^, conventional R-factors R are based
 on F, with F set to zero for negative F^2^. The threshold expression of
 F^2^ > 2sigma(F^2^) is used only for calculating R-factors(gt) etc. and is
 not relevant to the choice of reflections for refinement.  R-factors based
 on F^2^ are statistically about twice as large as those based on F, and R-
 factors based on ALL data will be even larger.
;
 
_refine_ls_structure_factor_coef  Fsqd
_refine_ls_matrix_type            full
_refine_ls_weighting_scheme       calc
_refine_ls_weighting_details
 'calc w=1/[\s^2^(Fo^2^)+(0.0394P)^2^+0.3534P] where P=(Fo^2^+2Fc^2^)/3'
_atom_sites_solution_primary      direct
_atom_sites_solution_secondary    difmap
_atom_sites_solution_hydrogens    geom
_refine_ls_hydrogen_treatment     mixed
_refine_ls_extinction_method      none
_refine_ls_extinction_coef        ?
_refine_ls_number_reflns          2642
_refine_ls_number_parameters      215
_refine_ls_number_restraints      0
_refine_ls_R_factor_all           0.0617
_refine_ls_R_factor_gt            0.0448
_refine_ls_wR_factor_ref          0.1055
_refine_ls_wR_factor_gt           0.0983
_refine_ls_goodness_of_fit_ref    1.075
_refine_ls_restrained_S_all       1.075
_refine_ls_shift/su_max           0.006
_refine_ls_shift/su_mean          0.000
 
loop_
 _atom_site_label
 _atom_site_type_symbol
 _atom_site_fract_x
 _atom_site_fract_y
 _atom_site_fract_z
 _atom_site_U_iso_or_equiv
 _atom_site_adp_type
 _atom_site_occupancy
 _atom_site_symmetry_multiplicity
 _atom_site_calc_flag
 _atom_site_refinement_flags
 _atom_site_disorder_assembly
 _atom_site_disorder_group
O2 O -0.25354(17) 0.88081(14) 0.80613(12) 0.0254(3) Uani 1 1 d . . .
O1 O -0.11488(19) 0.95384(14) 0.93504(12) 0.0302(4) Uani 1 1 d . . .
N1 N 0.4149(2) 0.36022(17) 0.97582(15) 0.0241(4) Uani 1 1 d . . .
N2 N 0.2304(2) 0.74561(19) 0.93235(15) 0.0239(4) Uani 1 1 d . . .
C17 C 0.0014(2) 0.7115(2) 0.83560(16) 0.0187(4) Uani 1 1 d . . .
C8 C 0.2665(2) 0.50973(19) 0.81333(16) 0.0168(4) Uani 1 1 d . . .
C9 C 0.4271(2) 0.51759(19) 0.69009(16) 0.0184(4) Uani 1 1 d . . .
H9A H 0.3731 0.5583 0.6246 0.022 Uiso 1 1 calc R . .
H9B H 0.4918 0.5865 0.7077 0.022 Uiso 1 1 calc R . .
C1 C 0.2553(3) 0.0578(2) 0.5441(2) 0.0306(5) Uani 1 1 d . . .
H1 H 0.2872 -0.0275 0.4912 0.037 Uiso 1 1 calc R . .
C4 C 0.1626(2) 0.31336(19) 0.70302(17) 0.0174(4) Uani 1 1 d . . .
C13 C 0.1591(2) 0.66799(19) 0.86886(16) 0.0178(4) Uani 1 1 d . . .
C10 C 0.5671(2) 0.3721(2) 0.63810(17) 0.0198(4) Uani 1 1 d . . .
C7 C 0.1069(2) 0.4496(2) 0.79265(17) 0.0177(4) Uani 1 1 d . . .
C5 C 0.2022(2) 0.3217(2) 0.57172(17) 0.0206(4) Uani 1 1 d . . .
H5 H 0.1975 0.4138 0.5366 0.025 Uiso 1 1 calc R . .
C12 C 0.3482(2) 0.42312(19) 0.90500(16) 0.0182(4) Uani 1 1 d . . .
C3 C 0.1686(2) 0.1737(2) 0.75317(19) 0.0232(4) Uani 1 1 d . . .
H3 H 0.1413 0.1654 0.8407 0.028 Uiso 1 1 calc R . .
C11 C 0.7407(3) 0.3411(2) 0.6349(2) 0.0304(5) Uani 1 1 d . . .
C15 C -0.0218(2) 0.58963(19) 0.76095(17) 0.0195(4) Uani 1 1 d . . .
H15A H 0.0168 0.6043 0.6703 0.023 Uiso 1 1 calc R . .
H15B H -0.1499 0.5838 0.7882 0.023 Uiso 1 1 calc R . .
C16 C -0.3790(3) 1.0275(2) 0.8262(2) 0.0378(6) Uani 1 1 d . . .
H16A H -0.4523 1.0454 0.9146 0.057 Uiso 1 1 calc R . .
H16B H -0.4596 1.0347 0.7751 0.057 Uiso 1 1 calc R . .
H16C H -0.3089 1.1001 0.8024 0.057 Uiso 1 1 calc R . .
C6 C 0.2485(3) 0.1957(2) 0.49257(19) 0.0255(4) Uani 1 1 d . . .
H6 H 0.2751 0.2032 0.4050 0.031 Uiso 1 1 calc R . .
C2 C 0.2146(3) 0.0478(2) 0.6741(2) 0.0303(5) Uani 1 1 d . . .
H2 H 0.2181 -0.0445 0.7088 0.036 Uiso 1 1 calc R . .
C14 C -0.1236(2) 0.8585(2) 0.86565(16) 0.0204(4) Uani 1 1 d . . .
H7 H 0.038(2) 0.4248(17) 0.8777(16) 0.008(4) Uiso 1 1 d . . .
H18 H 0.168(3) 0.837(3) 0.963(2) 0.033(6) Uiso 1 1 d . . .
H17 H 0.336(3) 0.702(2) 0.9483(19) 0.033(6) Uiso 1 1 d . . .
H11A H 0.829(3) 0.244(2) 0.600(2) 0.036(6) Uiso 1 1 d . . .
H11B H 0.792(3) 0.410(3) 0.666(2) 0.051(7) Uiso 1 1 d . . .
H10 H 0.525(3) 0.296(2) 0.6010(19) 0.030(5) Uiso 1 1 d . . .
 
loop_
 _atom_site_aniso_label
 _atom_site_aniso_U_11
 _atom_site_aniso_U_22
 _atom_site_aniso_U_33
 _atom_site_aniso_U_23
 _atom_site_aniso_U_13
 _atom_site_aniso_U_12
O2 0.0213(7) 0.0220(7) 0.0291(7) 0.0008(6) -0.0121(6) 0.0064(6)
O1 0.0398(8) 0.0212(7) 0.0265(7) -0.0070(6) -0.0175(6) 0.0070(6)
N1 0.0245(8) 0.0224(9) 0.0242(9) 0.0010(7) -0.0106(7) -0.0002(7)
N2 0.0247(9) 0.0164(9) 0.0302(9) -0.0068(7) -0.0161(8) 0.0049(8)
C17 0.0198(9) 0.0181(10) 0.0162(9) -0.0003(7) -0.0067(7) -0.0004(8)
C8 0.0185(9) 0.0149(9) 0.0182(9) 0.0012(7) -0.0091(7) -0.0024(7)
C9 0.0188(9) 0.0182(10) 0.0200(9) 0.0012(7) -0.0080(8) -0.0058(8)
C1 0.0263(11) 0.0201(11) 0.0468(14) -0.0109(9) -0.0163(10) -0.0014(9)
C4 0.0107(8) 0.0169(9) 0.0250(10) 0.0005(7) -0.0071(7) -0.0027(7)
C13 0.0201(9) 0.0172(10) 0.0145(9) -0.0005(7) -0.0059(7) -0.0019(8)
C10 0.0194(9) 0.0191(10) 0.0199(10) -0.0007(8) -0.0044(8) -0.0056(8)
C7 0.0155(9) 0.0186(10) 0.0182(10) 0.0016(7) -0.0045(8) -0.0042(7)
C5 0.0185(9) 0.0177(10) 0.0269(10) -0.0002(8) -0.0105(8) -0.0028(8)
C12 0.0163(9) 0.0156(9) 0.0197(10) -0.0034(8) -0.0044(8) 0.0000(7)
C3 0.0186(9) 0.0207(10) 0.0314(11) 0.0053(8) -0.0099(8) -0.0050(8)
C11 0.0208(10) 0.0223(11) 0.0477(13) -0.0063(10) -0.0126(9) -0.0021(9)
C15 0.0161(9) 0.0196(10) 0.0217(10) -0.0013(8) -0.0080(7) -0.0001(7)
C16 0.0348(12) 0.0328(12) 0.0332(12) 0.0041(10) -0.0128(10) 0.0151(10)
C6 0.0218(10) 0.0268(11) 0.0293(11) -0.0053(9) -0.0129(8) -0.0023(8)
C2 0.0259(11) 0.0151(10) 0.0515(14) 0.0040(9) -0.0159(10) -0.0041(8)
C14 0.0204(9) 0.0220(10) 0.0157(9) 0.0031(8) -0.0056(8) -0.0004(8)
 
_geom_special_details
;
 All esds (except the esd in the dihedral angle between two l.s. planes)
 are estimated using the full covariance matrix.  The cell esds are taken
 into account individually in the estimation of esds in distances, angles
 and torsion angles; correlations between esds in cell parameters are only
 used when they are defined by crystal symmetry.  An approximate (isotropic)
 treatment of cell esds is used for estimating esds involving l.s. planes.
;
 
loop_
 _geom_bond_atom_site_label_1
 _geom_bond_atom_site_label_2
 _geom_bond_distance
 _geom_bond_site_symmetry_2
 _geom_bond_publ_flag
O2 C14 1.347(2) . ?
O2 C16 1.439(2) . ?
O1 C14 1.216(2) . ?
N1 C12 1.142(2) . ?
N2 C13 1.343(2) . ?
C17 C13 1.358(3) . ?
C17 C14 1.440(3) . ?
C17 C15 1.499(2) . ?
C8 C12 1.478(2) . ?
C8 C13 1.530(2) . ?
C8 C9 1.556(3) . ?
C8 C7 1.574(2) . ?
C9 C10 1.500(3) . ?
C1 C2 1.378(3) . ?
C1 C6 1.387(3) . ?
C4 C5 1.391(3) . ?
C4 C3 1.397(3) . ?
C4 C7 1.513(3) . ?
C10 C11 1.306(3) . ?
C7 C15 1.537(2) . ?
C5 C6 1.381(3) . ?
C3 C2 1.380(3) . ?
 
loop_
 _geom_angle_atom_site_label_1
 _geom_angle_atom_site_label_2
 _geom_angle_atom_site_label_3
 _geom_angle
 _geom_angle_site_symmetry_1
 _geom_angle_site_symmetry_3
 _geom_angle_publ_flag
C14 O2 C16 115.67(15) . . ?
C13 C17 C14 123.60(17) . . ?
C13 C17 C15 111.63(15) . . ?
C14 C17 C15 124.75(16) . . ?
C12 C8 C13 110.92(14) . . ?
C12 C8 C9 108.47(14) . . ?
C13 C8 C9 109.06(14) . . ?
C12 C8 C7 111.77(15) . . ?
C13 C8 C7 101.01(14) . . ?
C9 C8 C7 115.41(14) . . ?
C10 C9 C8 115.38(15) . . ?
C2 C1 C6 119.68(19) . . ?
C5 C4 C3 118.08(17) . . ?
C5 C4 C7 122.56(16) . . ?
C3 C4 C7 119.32(17) . . ?
N2 C13 C17 129.52(17) . . ?
N2 C13 C8 120.36(16) . . ?
C17 C13 C8 109.97(15) . . ?
C11 C10 C9 124.10(18) . . ?
C4 C7 C15 116.27(15) . . ?
C4 C7 C8 117.82(14) . . ?
C15 C7 C8 102.99(14) . . ?
C6 C5 C4 121.23(18) . . ?
N1 C12 C8 177.35(18) . . ?
C2 C3 C4 120.69(19) . . ?
C17 C15 C7 102.82(14) . . ?
C5 C6 C1 119.81(19) . . ?
C1 C2 C3 120.51(19) . . ?
O1 C14 O2 122.77(16) . . ?
O1 C14 C17 125.17(17) . . ?
O2 C14 C17 112.05(16) . . ?
 
_diffrn_measured_fraction_theta_max    0.998
_diffrn_reflns_theta_full              25.13
_diffrn_measured_fraction_theta_full   0.998
_refine_diff_density_max    0.205
_refine_diff_density_min   -0.241
_refine_diff_density_rms    0.050
